# Supplementary material for: A triphenylamine-based aggregation-enhanced emission probe for viscosity and polarity analysis of lubricating oils
Source: Royal Society of Chemistry journal article supplement (doi:10.1039/d1ay01957k), 2021-12-27
Supplement: d1ay01957k1.pdf [file d1ay01957k1.pdf]

**A triphenylamine-based aggregation-enhanced emission probe for viscosity and  
polarity analysis of lubricating oils**

Pengxiao Jia,<sup>‡a,b</sup> Fu Wang,<sup>‡a</sup> Wei Zeng,<sup>b\*</sup> Zhaofeng Wang<sup>a\*</sup>

*<sup>a</sup>State Key Laboratory of Solid Lubrication, Lanzhou Institute of Chemical Physics,  
Chinese Academy of Sciences, Lanzhou, Gansu 730000, China*

*<sup>b</sup>Key Laboratory of Eco-functional Polymer Materials of the Ministry of Education,  
Key Laboratory of Eco-environmental Polymer Materials of Gansu Province, College  
of Chemistry and Chemical Engineering, Northwest Normal University, 967 Anning  
East Road, Lanzhou, Gansu 730070, China*

\*Authors to whom correspondence should be addressed:

Dr. Zhaofeng Wang, Tel: +86-931-4968682; Email: zhfwang@licp.cas.cn

Dr. Wei Zeng, Email: zengwei.science@gmail.com

## Supplementary information

### Contents

|                                                                                       |              |
|---------------------------------------------------------------------------------------|--------------|
| 1. Synthesis and structure of CPA-TPA.                                                | Scheme S1    |
| 2. $^1\text{H}$ , $^{13}\text{C}$ NMR and HRMS spectra for CPA-TPA.                   | Figure S1-S3 |
| 3. Particle size distribution of CPA-TPA in $\text{H}_2\text{O}/\text{DMF}$ mixtures. | Figure S4    |
| 4. Normalized emission spectra of CPA-TPA.                                            | Figure S5    |
| 5. Kinematic viscosity of PAO4/PAO40 mixtures.                                        | Table S1     |
| 6. Kinematic viscosity of ester oil/PAO4 mixtures.                                    | Table S2     |

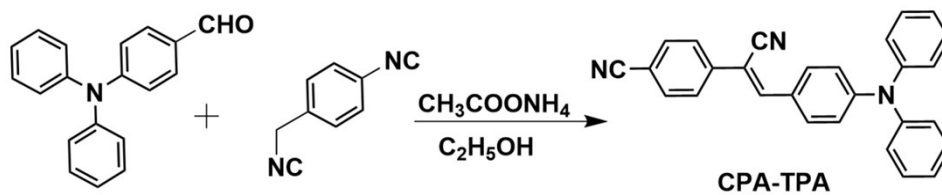

**Scheme S1** Synthesis and structure of CPA-TPA.

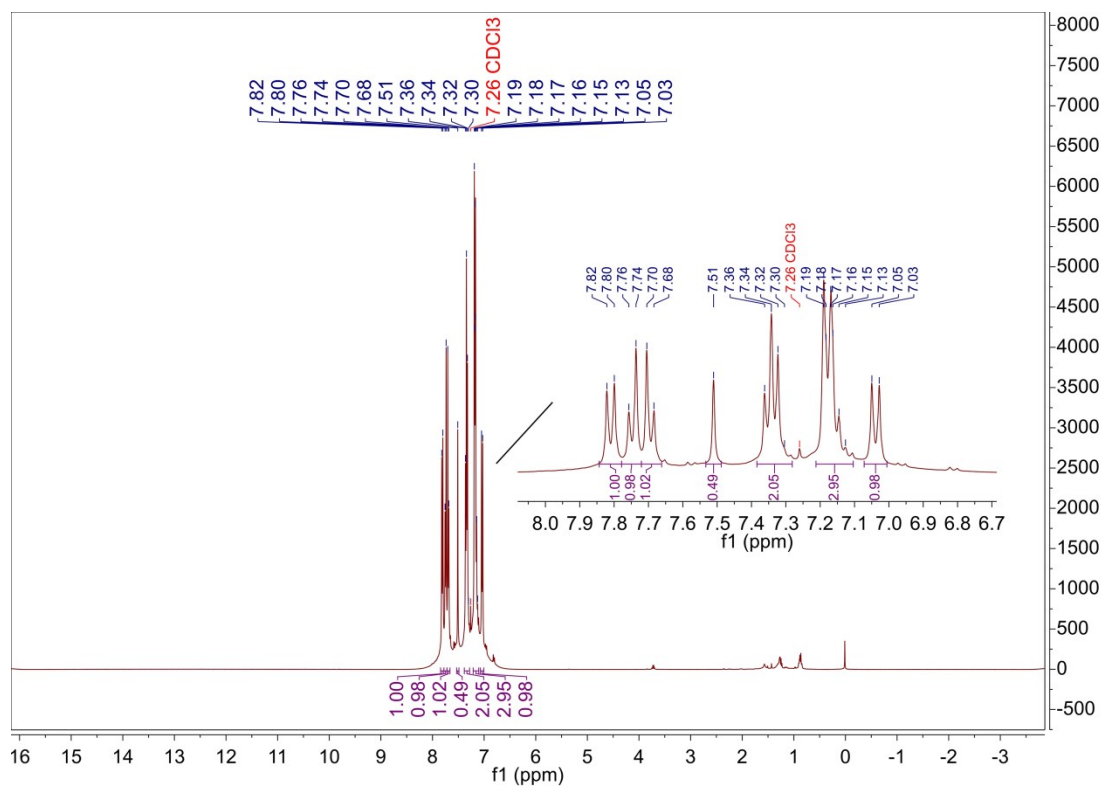

**Fig. S1**  $^1\text{H}$  NMR spectrum of compound CPA-TPA in  $\text{CDCl}_3$ .

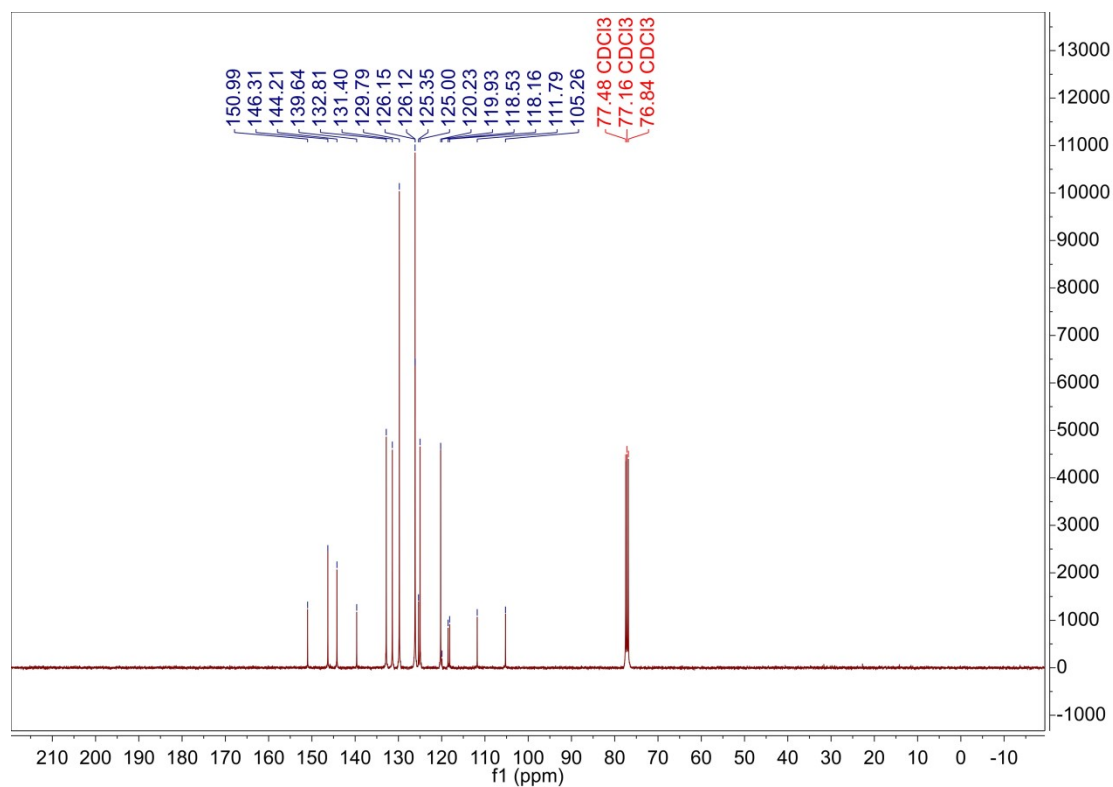

**Fig. S2** <sup>13</sup>C NMR spectrum of compound CPA-TPA in CDCl<sub>3</sub>.

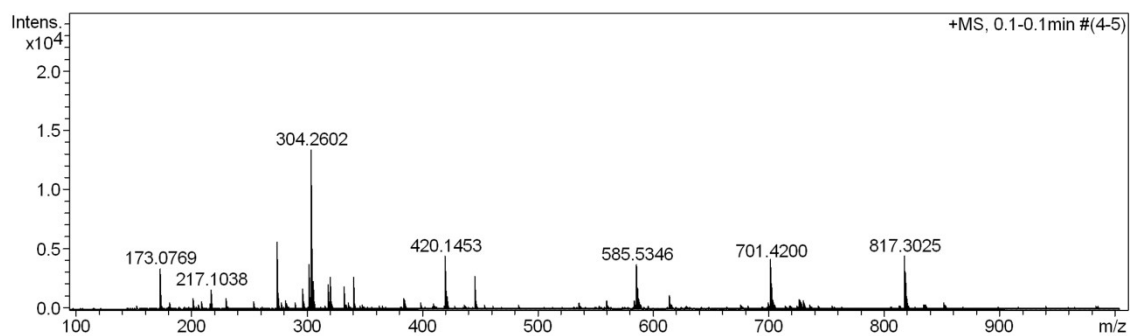

**Fig. S3** HRMS spectrum of compound CPA-TPA.

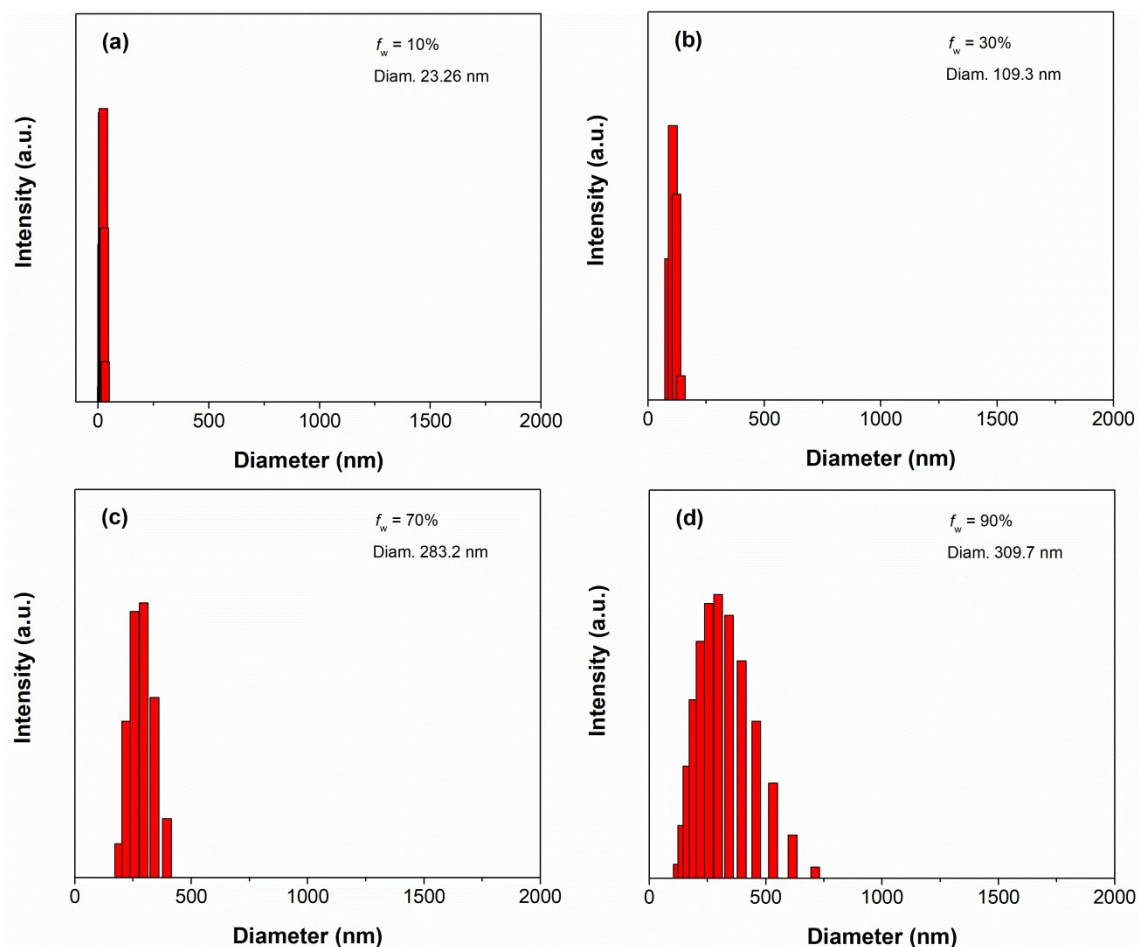

**Fig. S4** Particle size distribution of CPA-TPA aggregates in H<sub>2</sub>O/DMF mixtures with varying water proportions: (a)  $f_w = 10\%$ , (b)  $f_w = 30\%$ , (c)  $f_w = 70\%$ , and (d)  $f_w = 90\%$ .

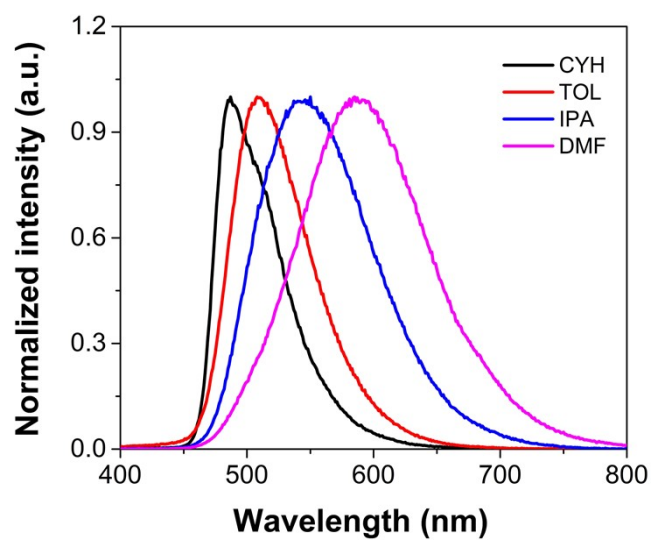

**Fig. S5** Normalized emission spectra of standard solution B in solvents with varying polarity.

**Table. S1** Real kinematic viscosity,  $\nu_r$ , of PAO40/PAO4 mixtures and the kinematic viscosity ( $\nu_a$  and  $\nu_b$ ) of PAO40/PAO4 mixtures after adding standard solution A or B.

| wt. %<br>PAO40/PAO<br>4 | $\nu_r$ mm <sup>2</sup> /s | $\nu_a$ mm <sup>2</sup> /s | $\nu_b$ mm <sup>2</sup> /s |
|-------------------------|----------------------------|----------------------------|----------------------------|
| PAO40                   | 708.18                     | 572.90                     | 317.86                     |
| 90 %                    | 472.94                     | 394.13                     | 244.74                     |
| 80 %                    | 304.01                     | 278.29                     | 162.48                     |
| 70 %                    | 230.39                     | 195.81                     | 119.42                     |
| 60%                     | 154.27                     | 137.17                     | 85.88                      |
| 50%                     | 111.16                     | 99.72                      | 63.79                      |
| 40%                     | 78.46                      | 73.77                      | 47.61                      |
| 30%                     | 60.65                      | 54.54                      | 33.02                      |
| 20%                     | 44.90                      | 38.30                      | 24.04                      |
| 10%                     | 30.31                      | 28.30                      | 19.10                      |
| PAO4                    | 22.17                      | 22.17                      | 15.12                      |

**Table. S2** Real kinematic viscosity of ester oil/PAO4 mixtures.

| wt. %<br>ester/PAO4 | $\nu_r$ mm <sup>2</sup> /s<br>(TMP) | $\nu_r$ mm <sup>2</sup> /s<br>(DA) | $\nu_r$ mm <sup>2</sup> /s<br>(PE) |
|---------------------|-------------------------------------|------------------------------------|------------------------------------|
| Ester               | 24.65                               | 34.51                              | 28.36                              |
| 80 %                | 23.55                               | 29.88                              | 27.37                              |
| 60 %                | 22.82                               | 26.40                              | 26.08                              |
| 40 %                | 22.39                               | 24.05                              | 24.81                              |
| 20%                 | 22.12                               | 21.92                              | 22.48                              |
| PAO4                | 20.79                               | 20.79                              | 20.79                              |
